# Supplementary material for: η6-Coordinated ruthenabenzenes from three-component assembly on a diruthenium μ-allenyl scaffold
Source: Royal Society of Chemistry journal article supplement (doi:10.1039/d2dt01071b), 2022-01-01

# $\eta^6$ -Coordinated Ruthenabenzenes from Three-Component Assembly on a Diruthenium $\mu$ -Allenyl Scaffold

Giulio Bresciani, Stefano Zacchini, Guido Pampaloni, Marco Bortoluzzi, Fabio  
Marchetti

## Supporting Information

| <b><u>Table of contents</u></b>                                                        | <i>Pages</i> |
|----------------------------------------------------------------------------------------|--------------|
| <b>Figures S1, Table S1:</b> DFT structure of [2] <sup>+</sup>                         | S2           |
| <b>Figures S2:</b> DFT-optimized structures and RMS deviations of literature compounds | S2           |
| <b>Figures S3:</b> DFT-optimized isomers of 5                                          | S3           |
| <b>Figures S4-S18:</b> NMR spectra                                                     | S4-S12       |

**Figure S1.** DFT optimized structure of  $[2]^+$  and selected Hirshfeld charges (a.u.) in parenthesis. Hydrogen atoms, with the exception of the hydroxyl moiety, are omitted for clarity. Colour map: Ru, green; C, grey; O, red; H, white. Selected computed bond lengths (Å): Ru1-C6 2.046, C1-C7 1.428, C7-C1 1.432, C1-C2 1.425, C2-C5 1.438, C5-Ru1 2.005, Ru1---Ru2 2.754, Ru2-C6 2.151, Ru2-C1 2.195, Ru2-C2 2.219, Ru2-C5 2.186, C5-O 1.347.

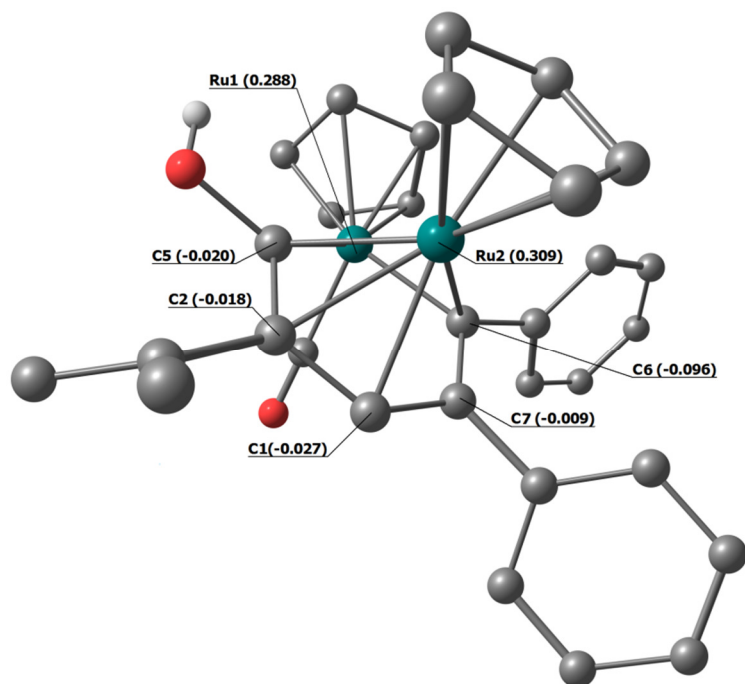

**Table S1.** Density ( $\rho$ ) and potential energy density ( $V$ ) values (a.u.) for selected b.c.p. in  $[2]^+$ .

| Bond   | $\rho$ | $V$    |
|--------|--------|--------|
| Ru2-C1 | 0.094  | -0.114 |
| Ru2-C3 | 0.082  | -0.103 |
| Ru2-C4 | 0.080  | -0.097 |
| Ru2-C5 | 0.089  | -0.102 |

**Figure S2.** DFT optimized structures of  $[\text{Ru}_2\text{Cp}^*_2(\text{SiMe}_3)(\mu\text{-}\eta^2\text{:}\eta^5\text{-C}_5\text{H}_5)]$  (a) and  $[\text{Ru}_3(\text{CO})_9\{\mu_3\text{-(FcCCH)}_2\text{CC=CPh}_2\}]$  (b). Hydrogen atoms are omitted for clarity. Colour map: Ru, green; Fe, violet; Si, dark yellow; C, grey; O, red. RDS with respect to X-ray data: 0.049 Å for (a), 0.593 Å for (b).

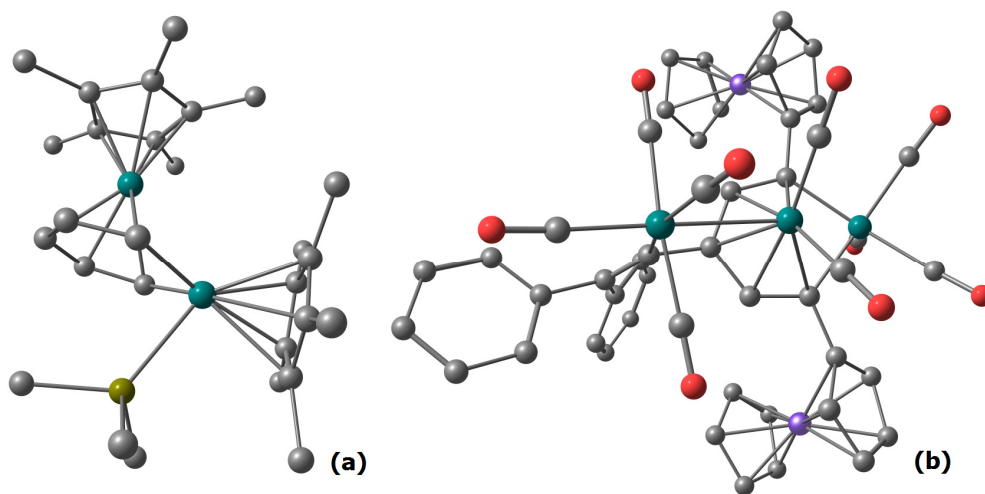

**Figure S3.** Comparison of DFT-optimized isomers of **5** (structures and relative Gibbs free energy). Hydrogen atoms, with the exception of the ruthenacene moiety, are omitted for clarity. Colour map: Ru, green; C, grey; O, red; H, white.

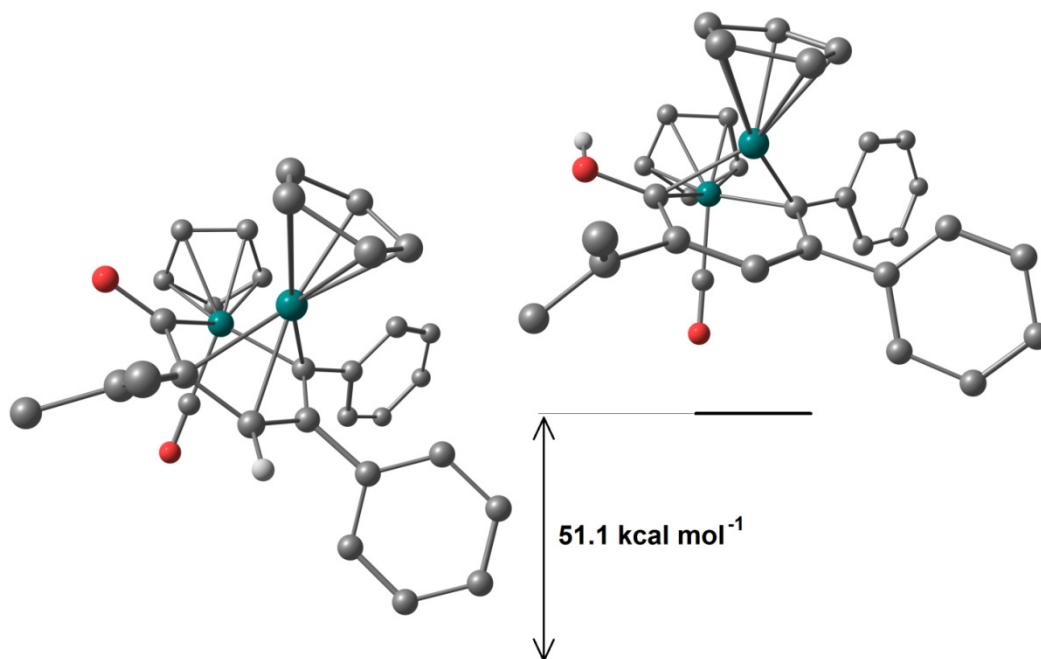

**Figure S4.**  $^1\text{H}$  NMR spectrum (401 MHz, acetone- $d_6$ ) of **2**.

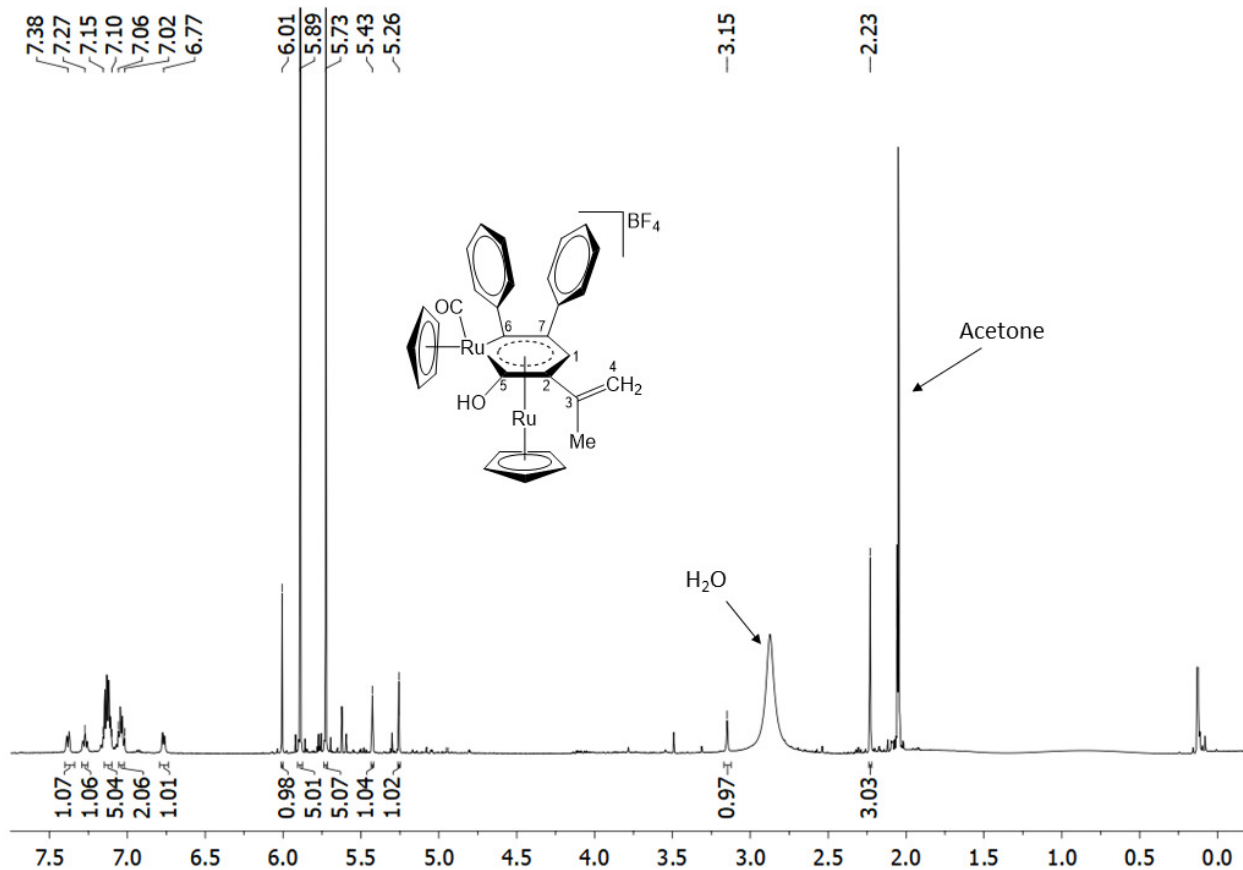

**Figure S5.**  $^{13}\text{C}\{^1\text{H}\}$  NMR spectrum (101 MHz, acetone- $d_6$ ) of **2**.

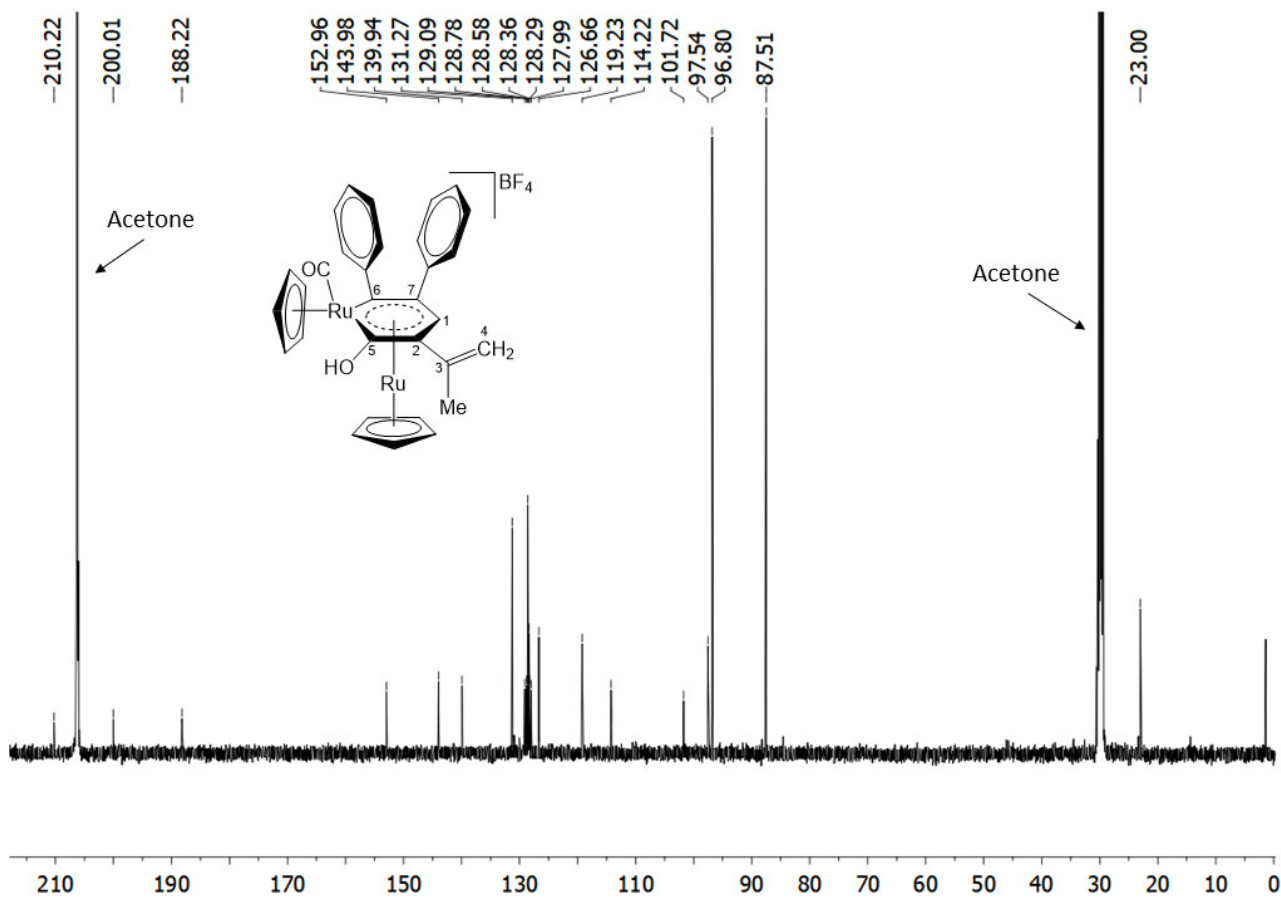

**Figure S6.**  $^{19}\text{F}\{^1\text{H}\}$  NMR spectrum (376 MHz, acetone- $d_6$ ) of **2**.

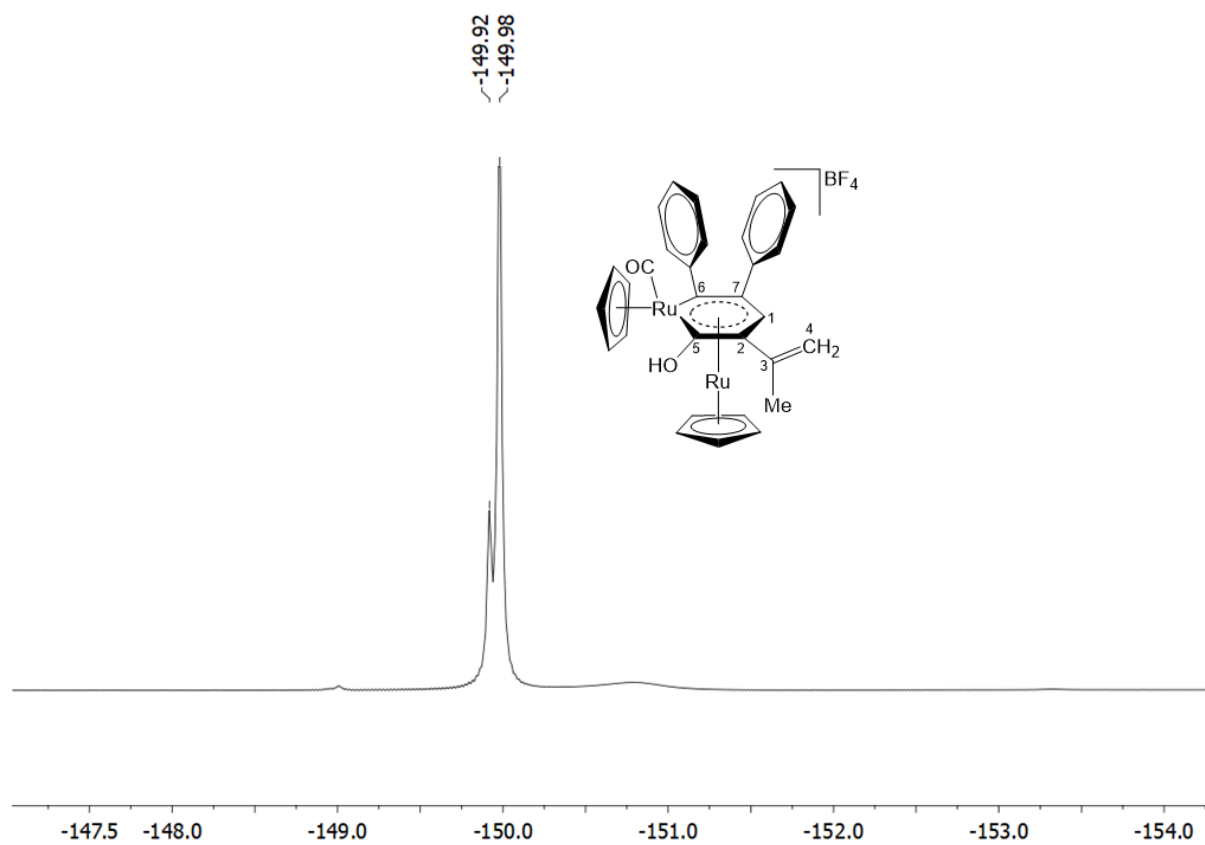

Figure S7.  $^1\text{H}$  NMR spectrum (401 MHz, acetone- $d_6$ ) of **3**.

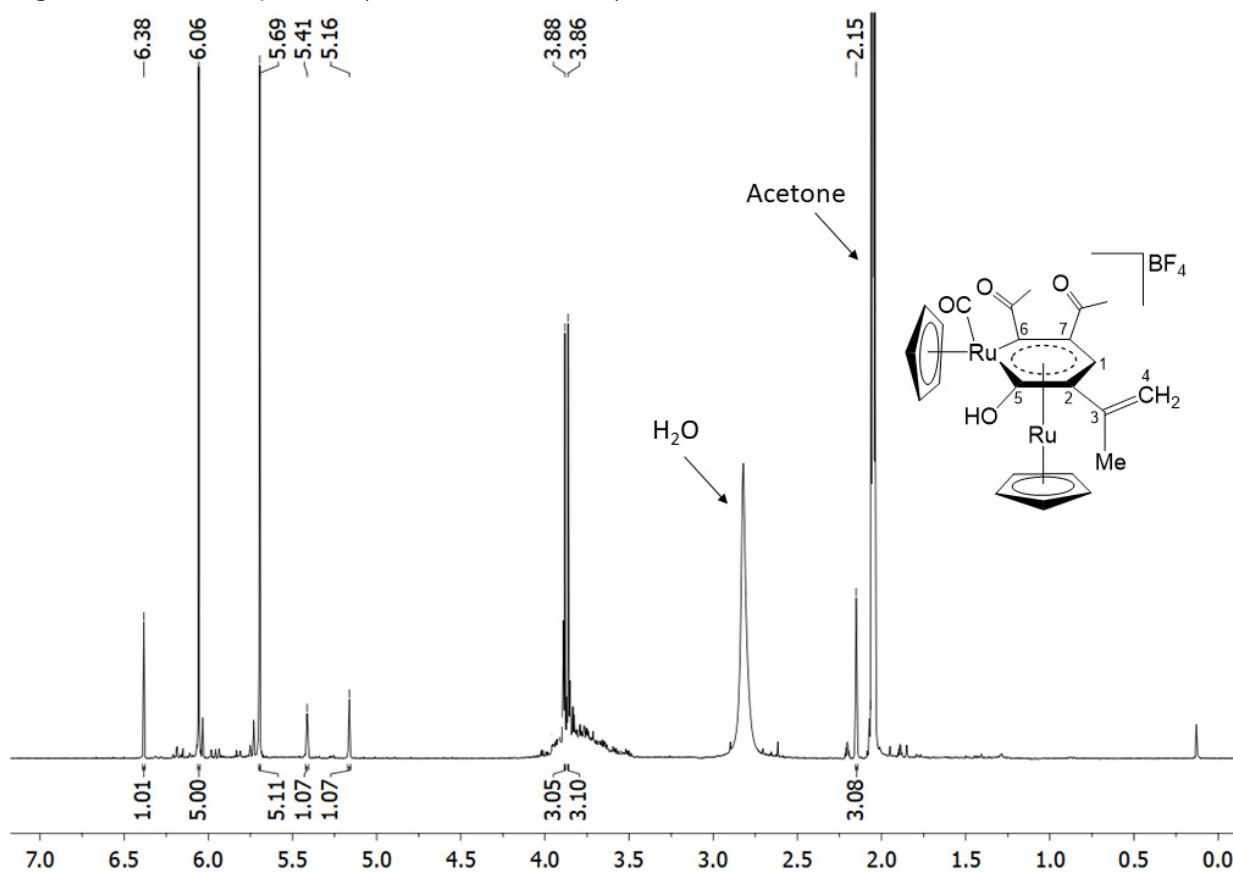

Figure S8.  $^{13}\text{C}\{^1\text{H}\}$  NMR spectrum (101 MHz, acetone- $d_6$ ) of **3**.

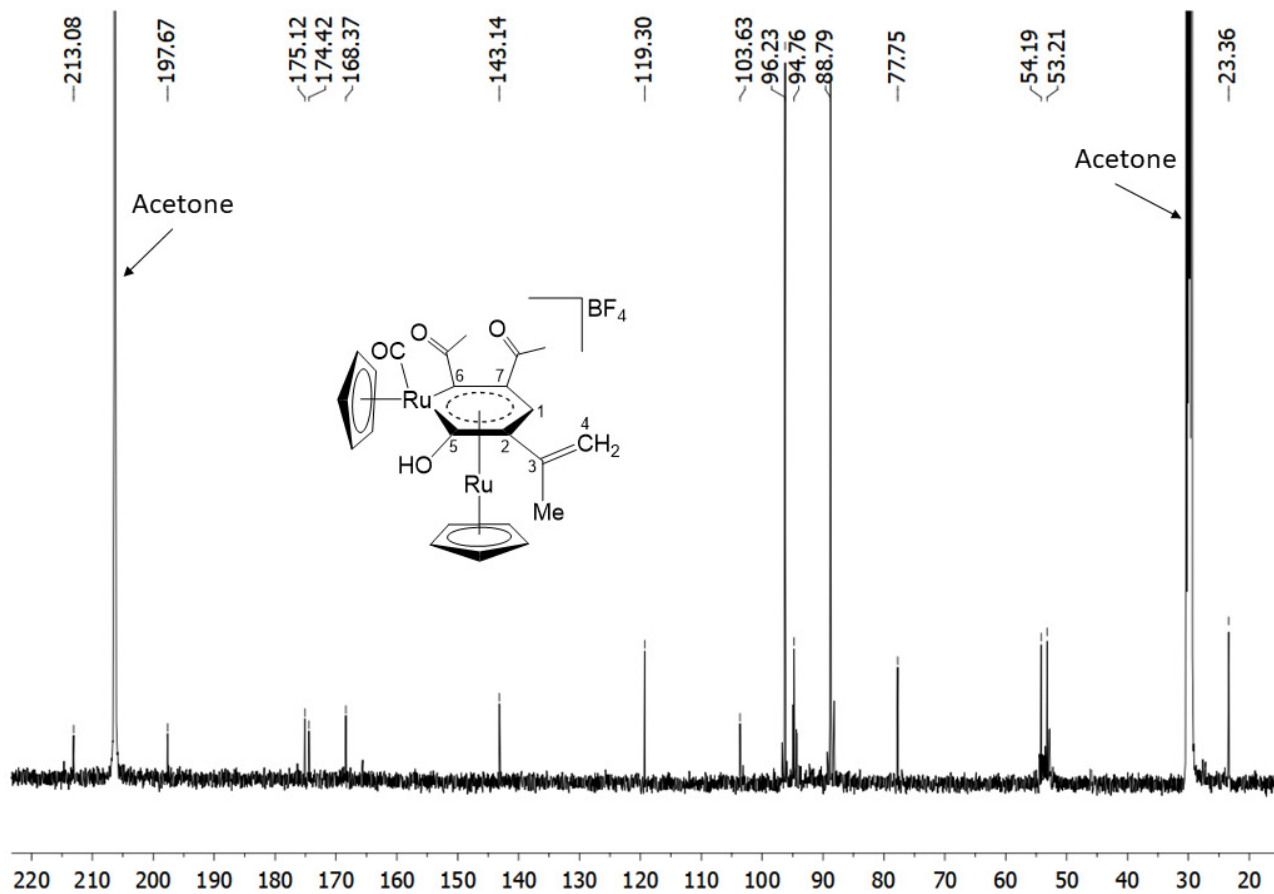

**Figure S9.**  $^{19}\text{F}\{^1\text{H}\}$  NMR spectrum (376 MHz, acetone- $d_6$ ) of **3**.

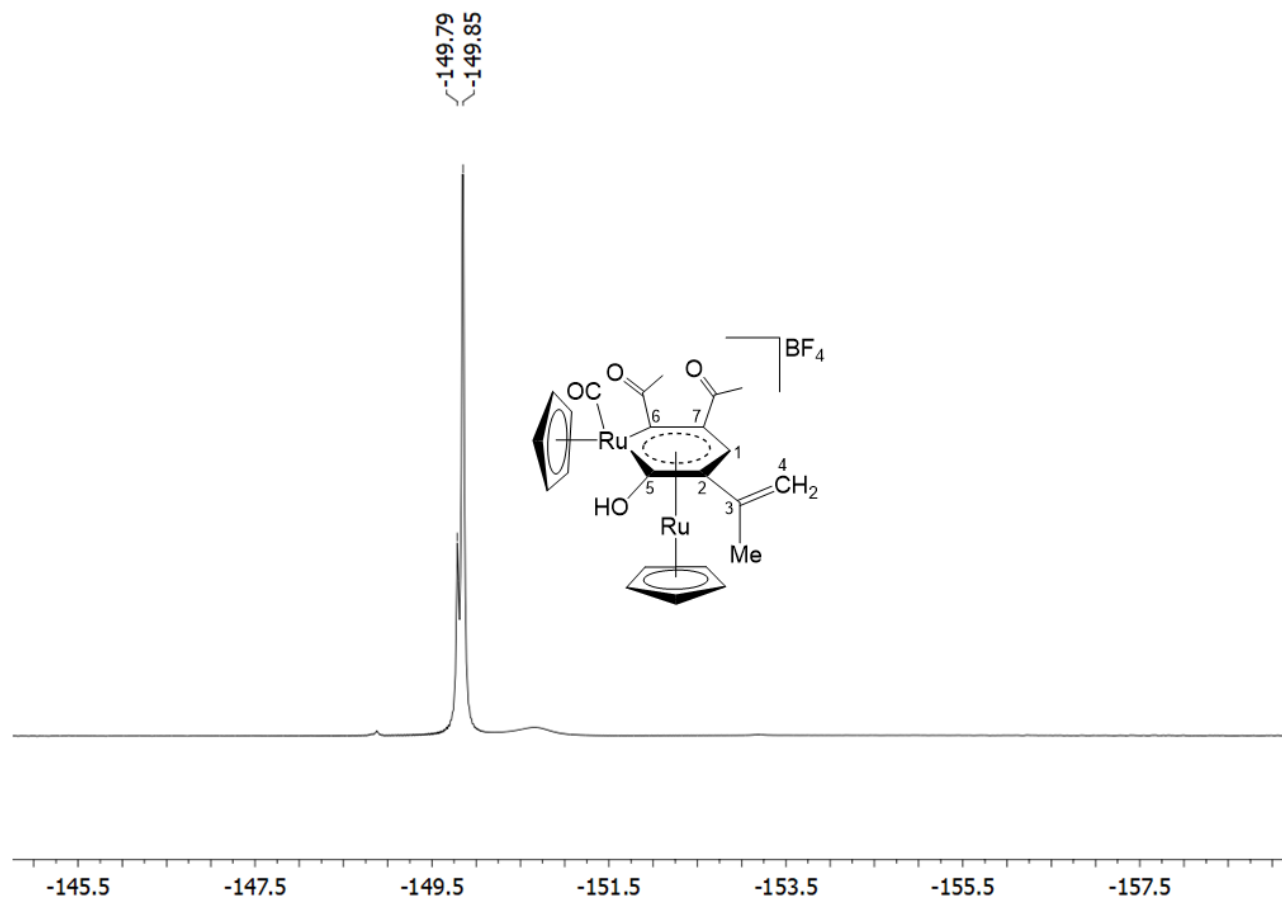

Figure S10.  $^1\text{H}$  NMR spectrum (401 MHz, acetone- $d_6$ ) of **4**.

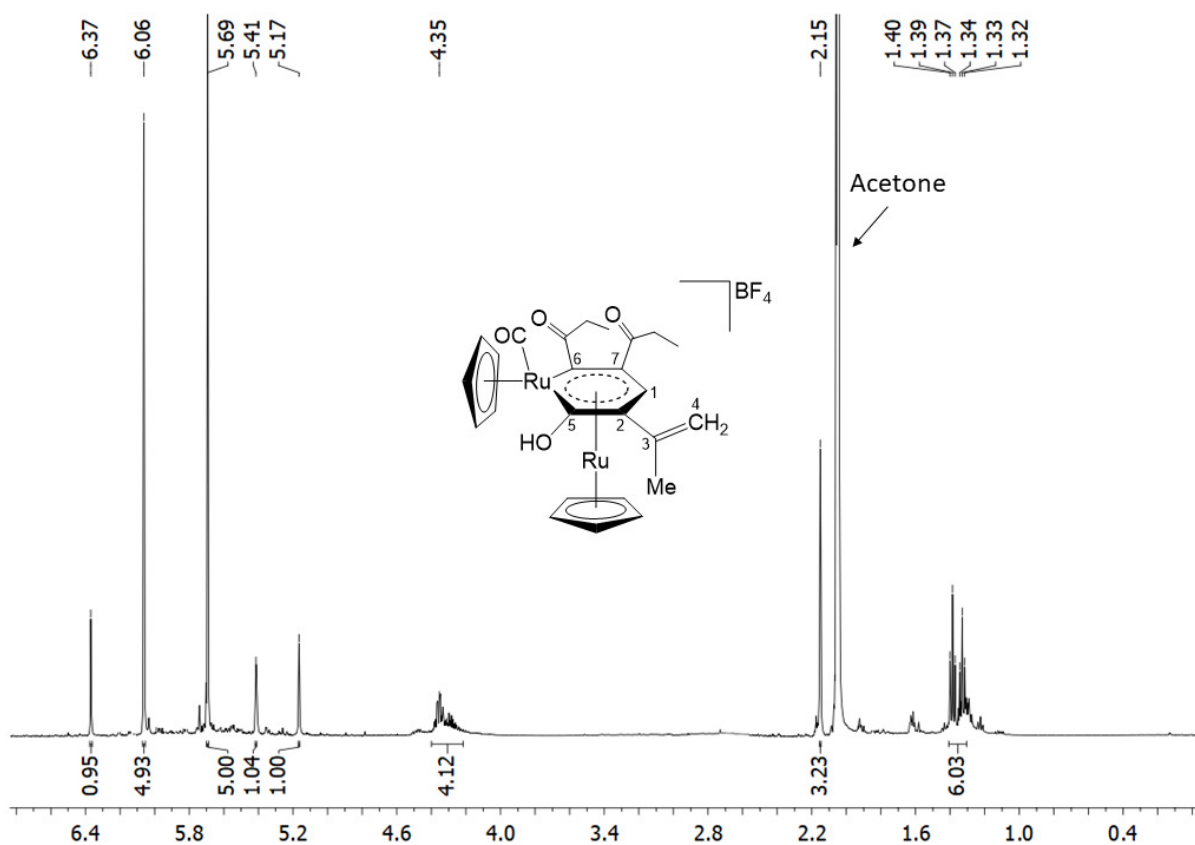

Figure S11.  $^{13}\text{C}\{^1\text{H}\}$  NMR spectrum (101 MHz, acetone- $d_6$ ) of **4**.

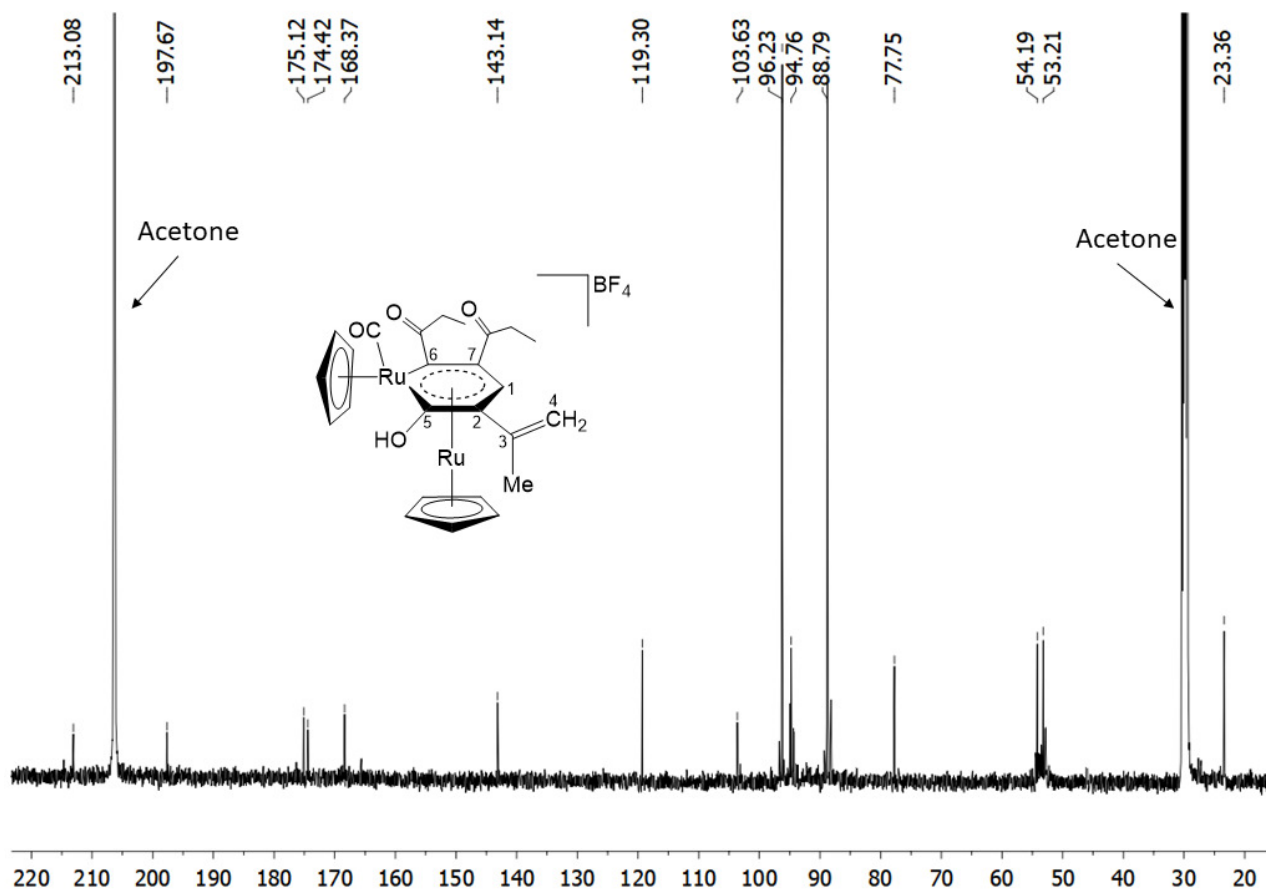



Figure S12.  $^{19}\text{F}\{^1\text{H}\}$  NMR spectrum (376 MHz, acetone- $d_6$ ) of **4**.

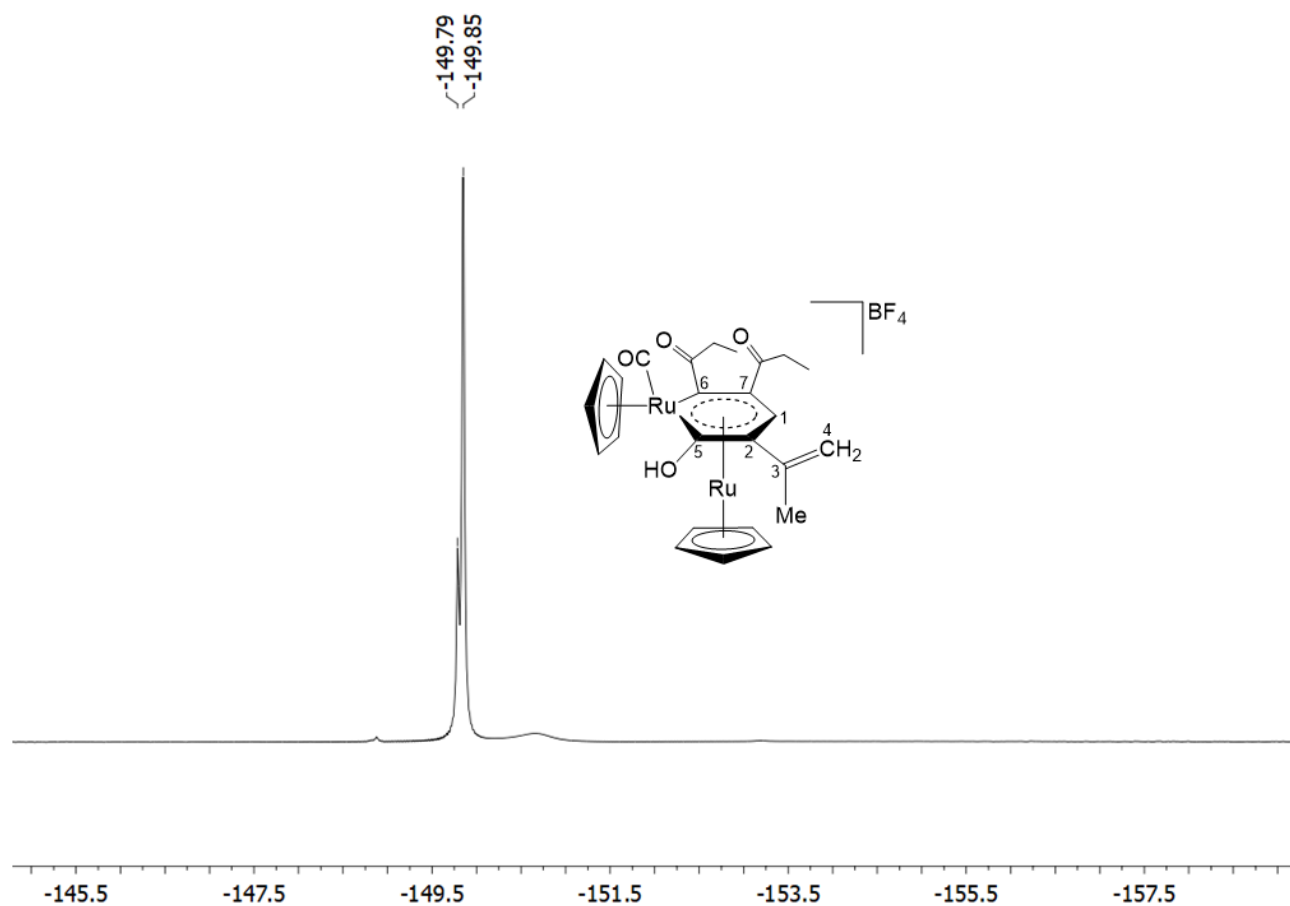

Figure S13.  $^1\text{H}$  NMR spectrum (401 MHz,  $\text{CDCl}_3$ ) of **5**.

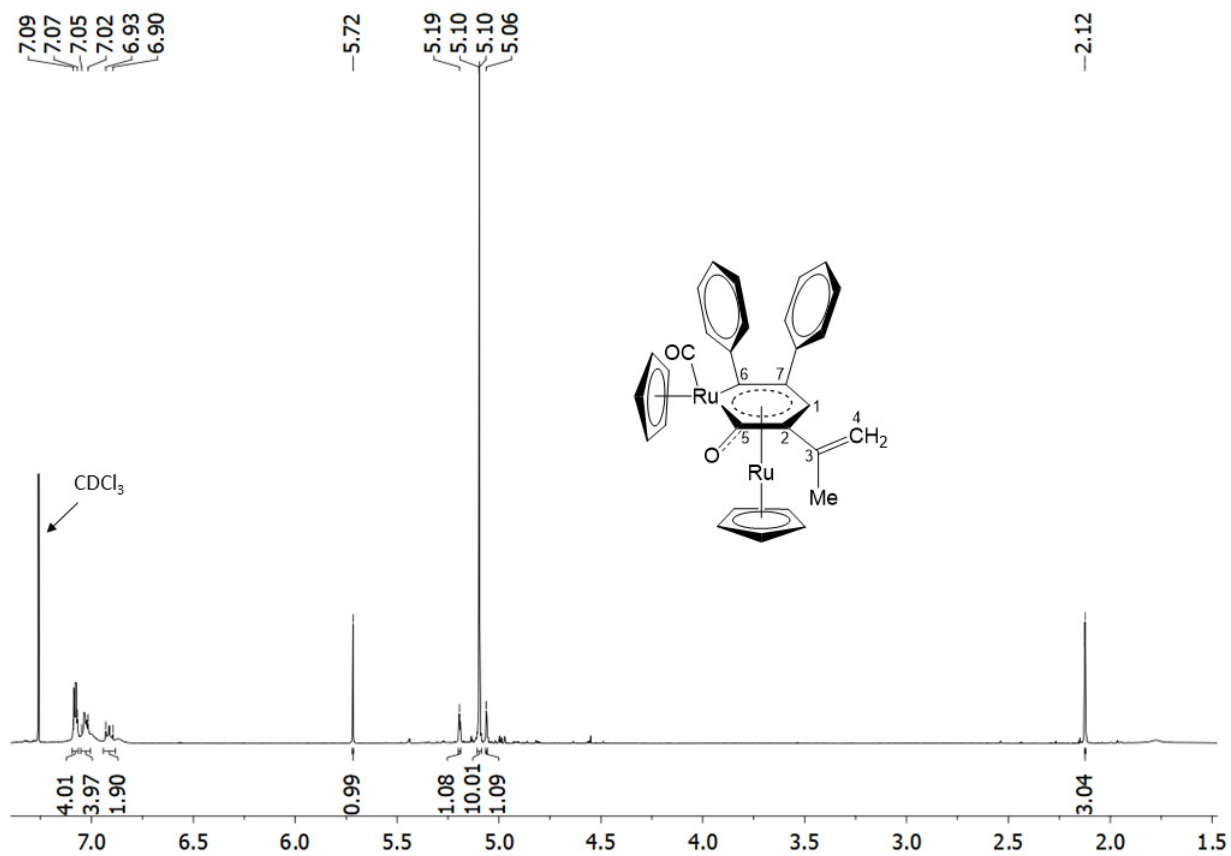

Figure S14.  $^{13}\text{C}\{^1\text{H}\}$  NMR spectrum (101 MHz,  $\text{CDCl}_3$ ) of **5**.

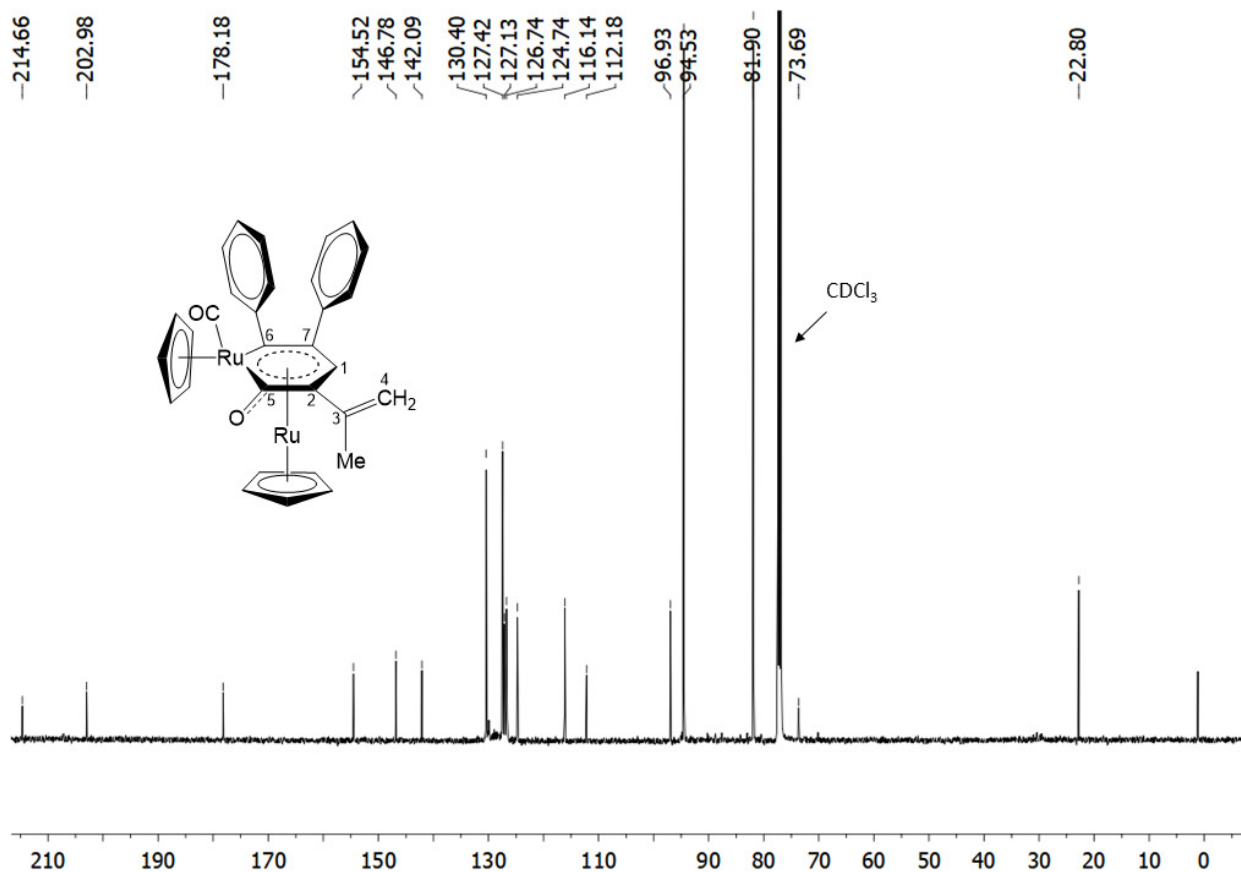

**Figure S15.**  $^1\text{H}$  NMR spectrum (401 MHz,  $\text{CDCl}_3$ ) of **6**.

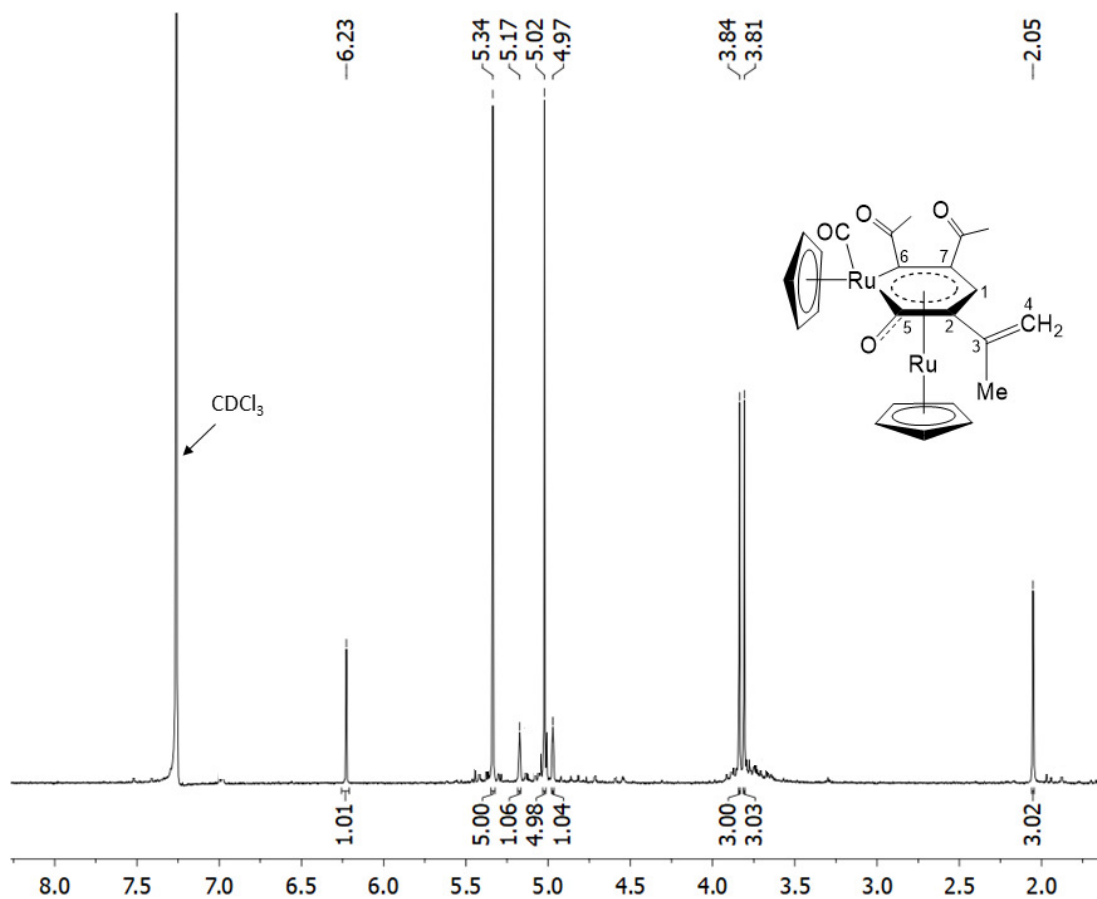

**Figure S16.**  $^{13}\text{C}\{^1\text{H}\}$  NMR spectrum (101 MHz,  $\text{CDCl}_3$ ) of **6**.

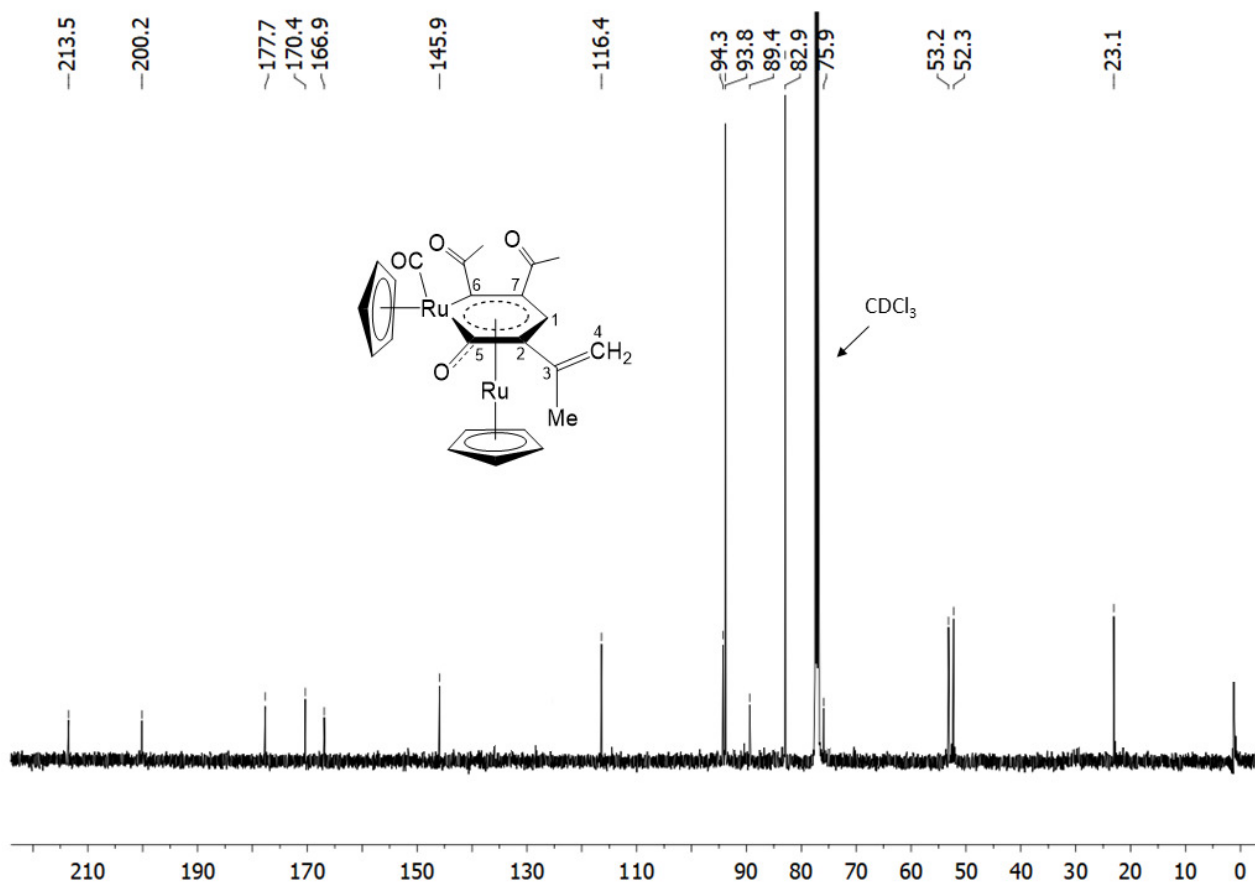

Figure S17.  $^1\text{H}$  NMR spectrum (401 MHz,  $\text{CDCl}_3$ ) of 7.

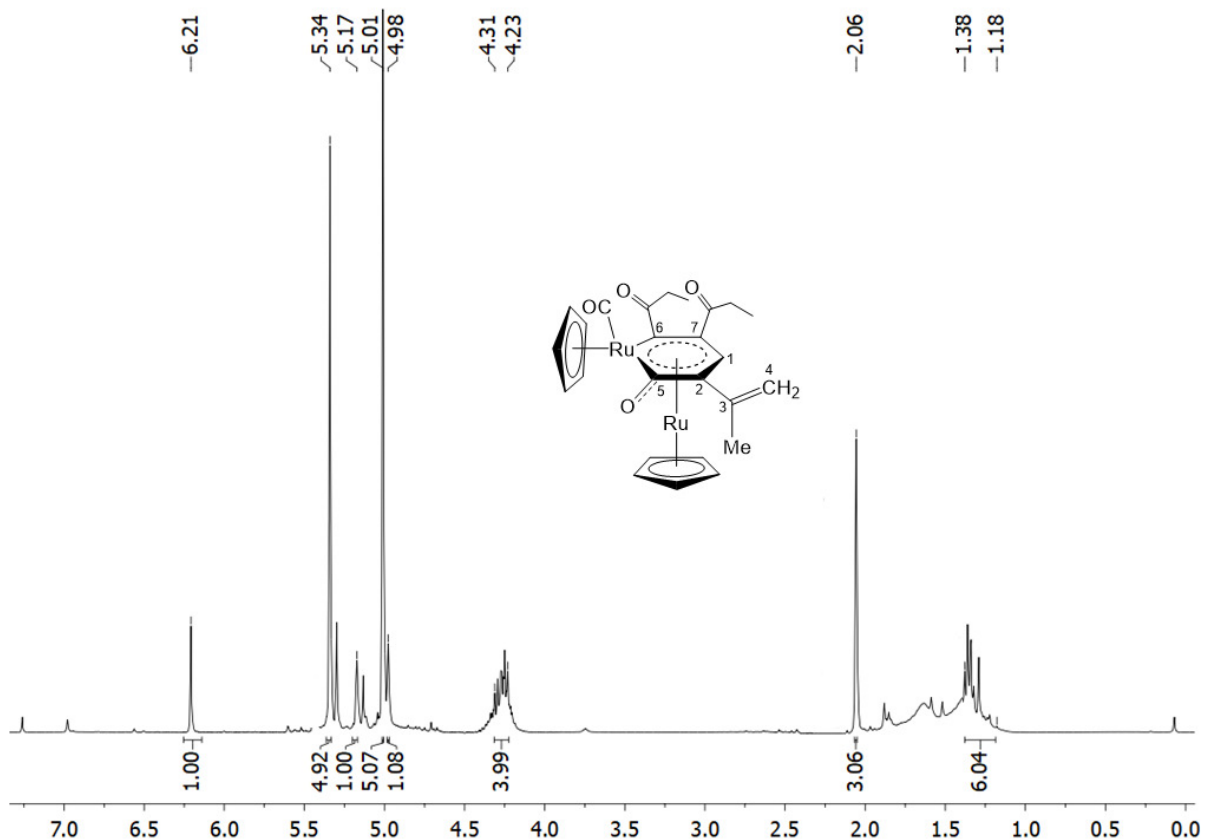

Figure S18.  $^{13}\text{C}\{^1\text{H}\}$  NMR spectrum (101 MHz,  $\text{CDCl}_3$ ) of 7.

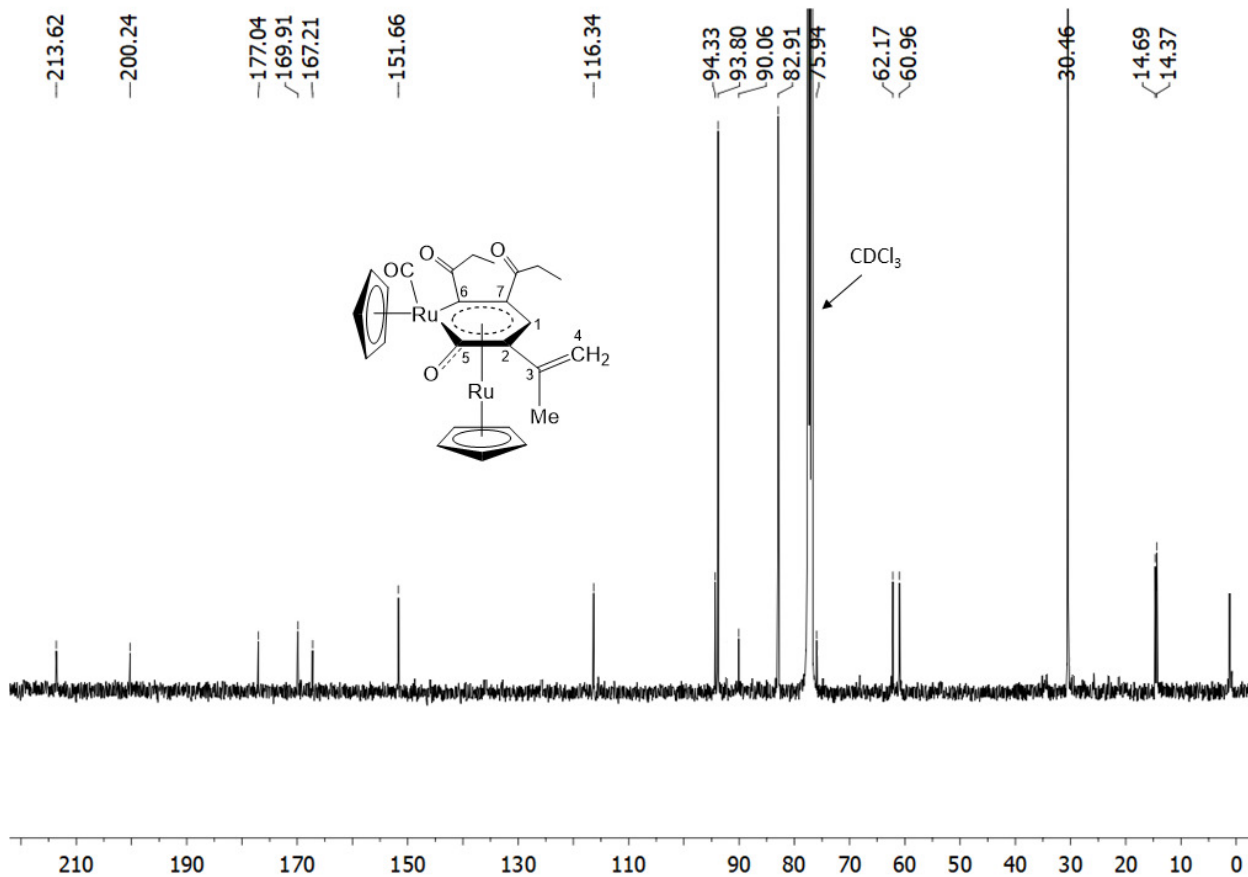

Supplement: d2dt01071b2.pdf [file d2dt01071b2.pdf]
